# Supplementary material for: Arylamine Analogs of Methylene Blue: Substituent Effect on Aggregation Behavior and DNA Binding
Source: MDPI journal article supplement (doi:10.3390/ijms22115847), 2021-05-29
Supplement: s1 [file s1]

Supplementary information

# Arylamine Analogs of Methylene Blue: Substituent Effect on Aggregation Behavior and DNA Binding

Alena Khadieva, Olga Mostovaya, Pavel Padnya, Valeriy Kalinin, Denis Grishaev, Dmitrii Tumakov and Ivan Stoikov

## Content

|         |                                                                                                   |
|---------|---------------------------------------------------------------------------------------------------|
| 2 ..... | FIGURE S1. $^1\text{H}$ NMR SPECTRUM OF THE COMPOUND PTZA, $\text{DMSO-}D_6$ , 300 K, 400 MHZ.    |
| 2 ..... | FIGURE S2. $^1\text{H}$ NMR SPECTRUM OF THE COMPOUND PTZ1, $\text{DMSO-}D_6$ , 300 K, 400 MHZ.    |
| 3 ..... | FIGURE S3. $^1\text{H}$ NMR SPECTRUM OF THE COMPOUND PTZ2, $\text{DMSO-}D_6$ , 300 K, 400 MHZ.    |
| 3 ..... | FIGURE S4. $^{13}\text{C}$ NMR SPECTRUM OF THE COMPOUND PTZA, $\text{DMSO-}D_6$ , 300 K, 100 MHZ. |
| 4 ..... | FIGURE S5. $^{13}\text{C}$ NMR SPECTRUM OF THE COMPOUND PTZ1, $\text{DMSO-}D_6$ , 300 K, 100 MHZ. |
| 4 ..... | FIGURE S6. $^{13}\text{C}$ NMR SPECTRUM OF THE COMPOUND PTZ2, $\text{DMSO-}D_6$ , 300 K, 100 MHZ. |
| 5 ..... | FIGURE S7. FT-IR SPECTRUM OF THE COMPOUND PTZA.                                                   |
| 5 ..... | FIGURE S8. FT-IR SPECTRUM OF THE COMPOUND PTZ1.                                                   |
| 5 ..... | FIGURE S9. FT-IR SPECTRUM OF THE COMPOUND PTZ2.                                                   |
| 6 ..... | FIGURE S10. HRMS SPECTRUM OF THE COMPOUND PTZA.                                                   |
| 6 ..... | FIGURE S11. HRMS SPECTRUM OF THE COMPOUND PTZ1.                                                   |
| 7 ..... | FIGURE S12. HRMS SPECTRUM OF THE COMPOUND PTZ2.                                                   |
| 7 ..... | FIGURE S13. $1/[\text{DNA}]$ VERSUS $A_0/(A - A_0)$ PLOT FOR MB-DNA UV-VIS TITRATION.             |
| 8 ..... | FIGURE S14. $1/[\text{DNA}]$ VERSUS $A_0/(A - A_0)$ PLOT FOR PTZ1-DNA UV-VIS TITRATION.           |

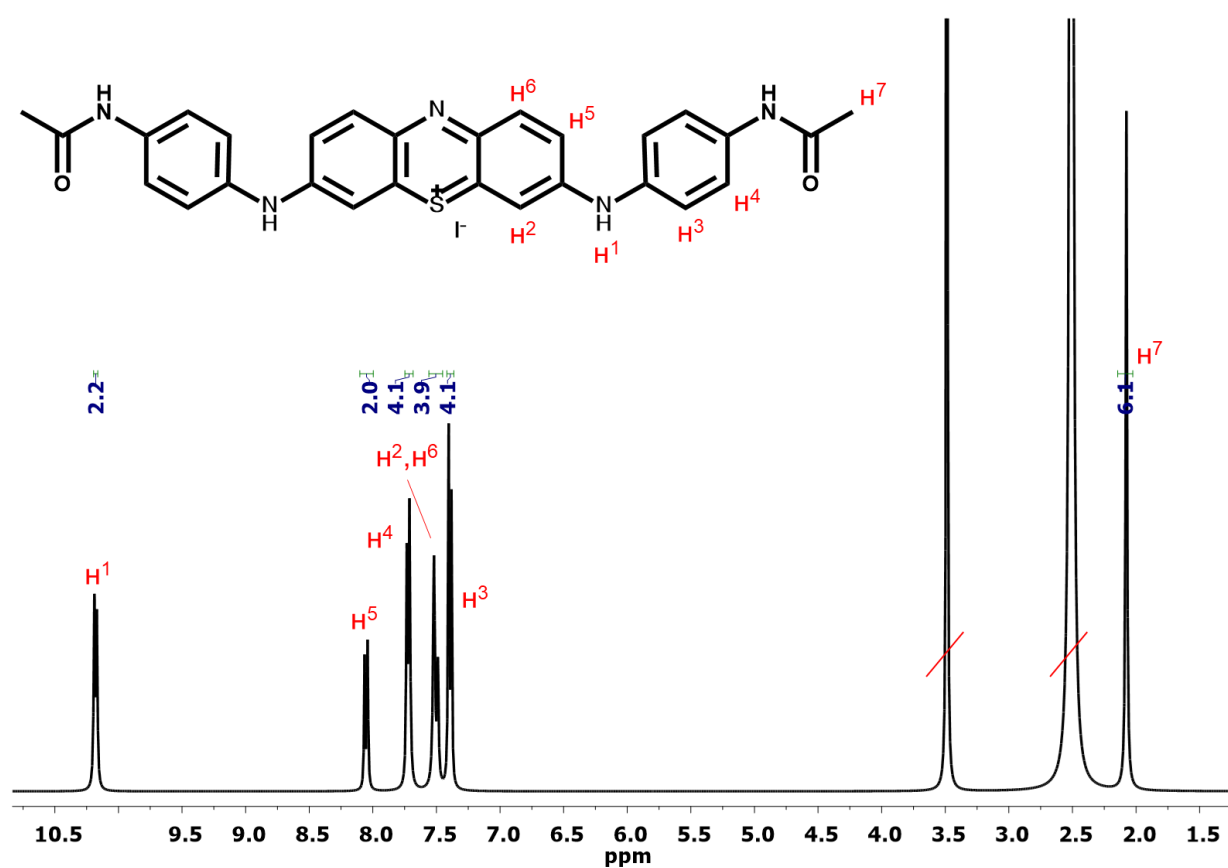

Figure S1.  $^1\text{H}$  NMR spectrum of the compound **PTZa**,  $\text{DMSO}-d_6$ , 300 K, 400 MHz.

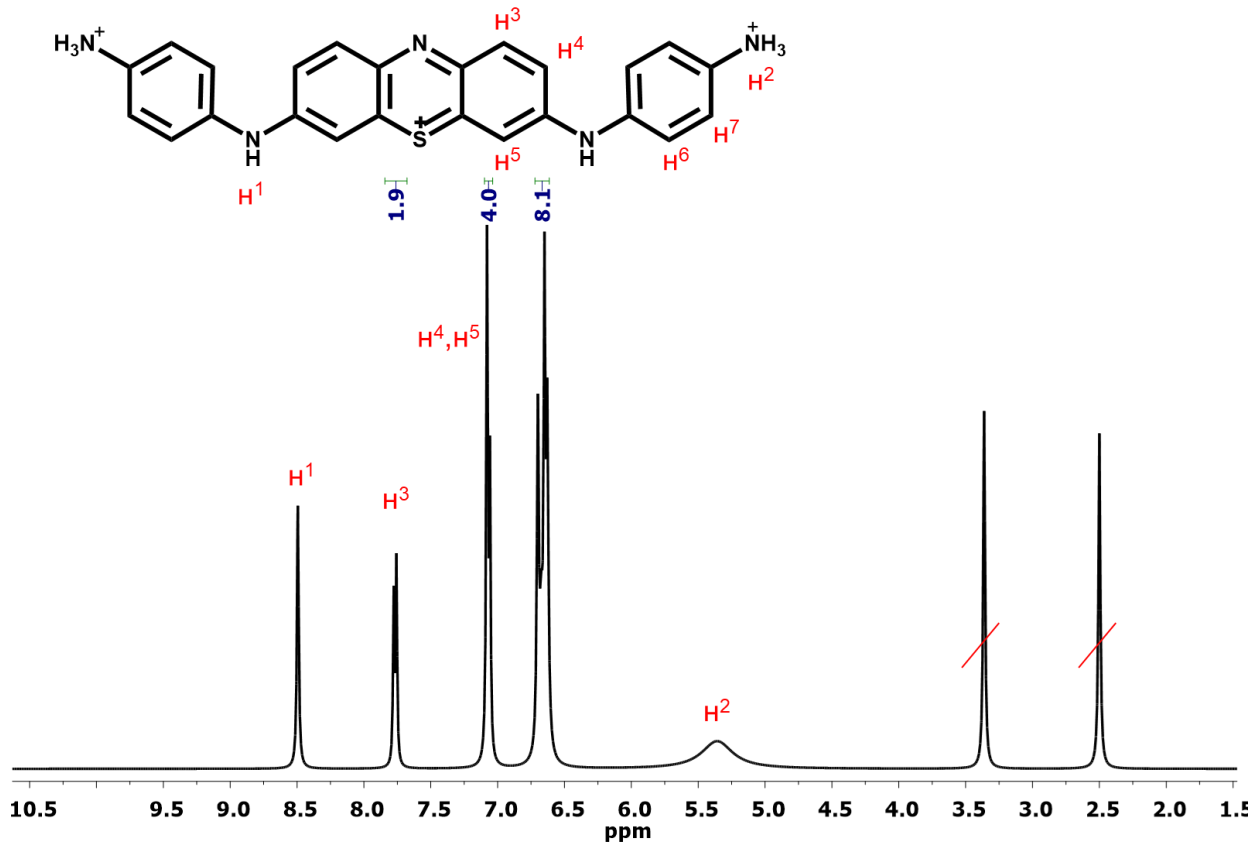

Figure S2.  $^1\text{H}$  NMR spectrum of the compound **PTZ1**,  $\text{DMSO}-d_6$ , 300 K, 400 MHz.

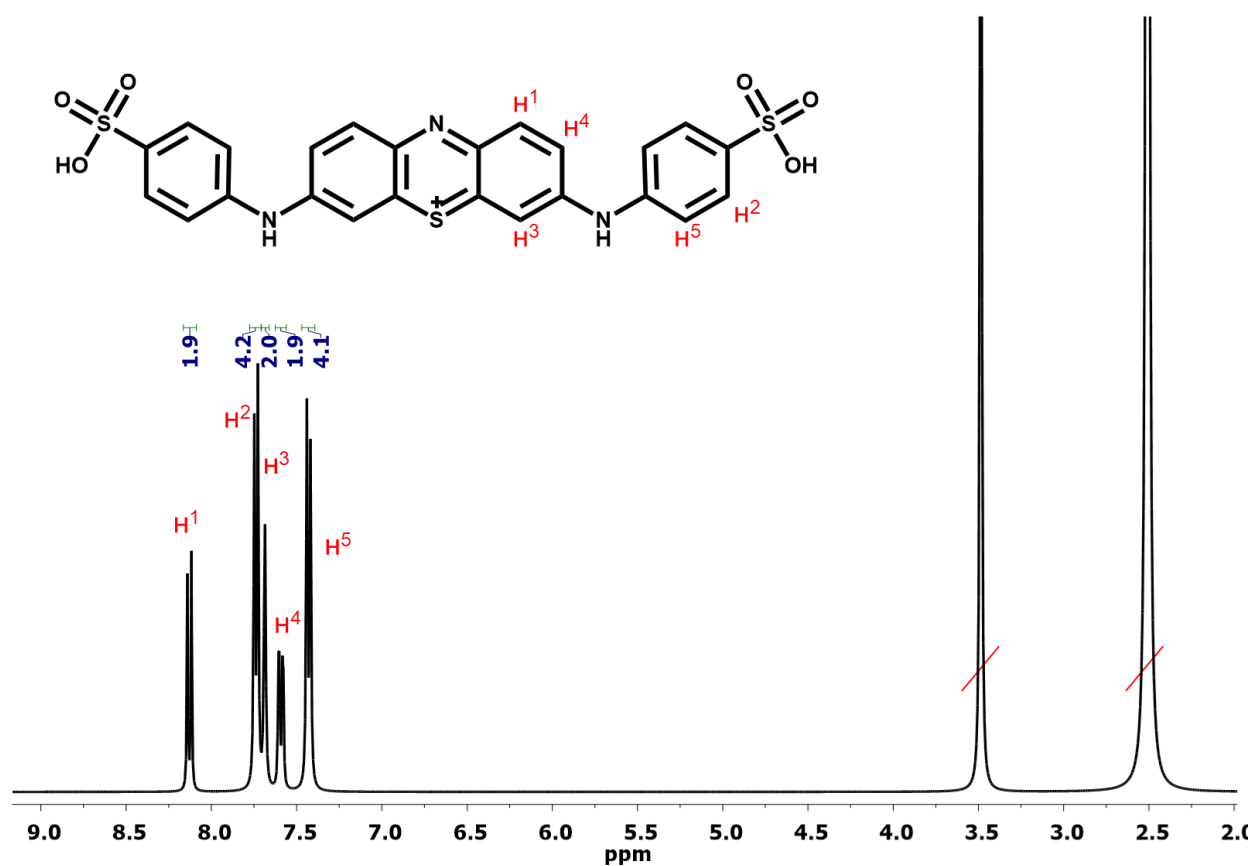

Figure S3. <sup>1</sup>H NMR spectrum of the compound **PTZ2**, DMSO-*d*<sub>6</sub>, 300 K, 400 MHz.

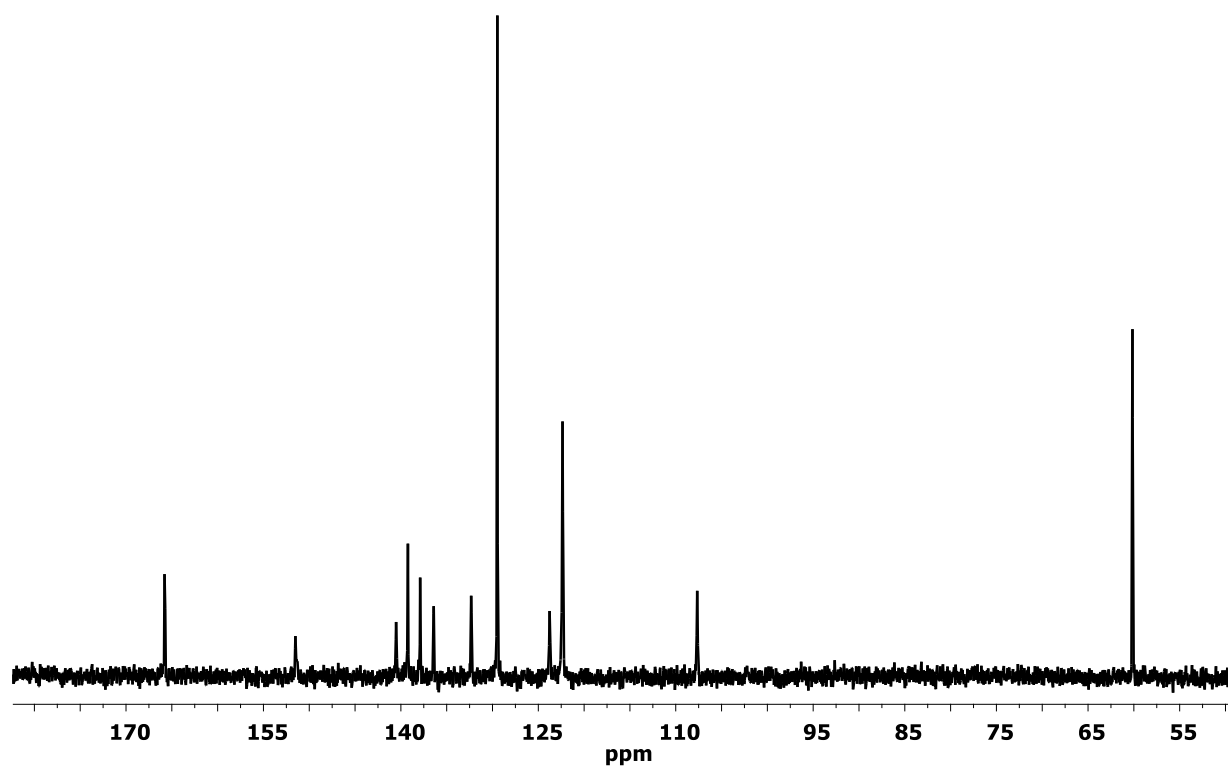

Figure S4. <sup>13</sup>C NMR spectrum of the compound **PTZa**, DMSO-*d*<sub>6</sub>, 300 K, 100 MHz.

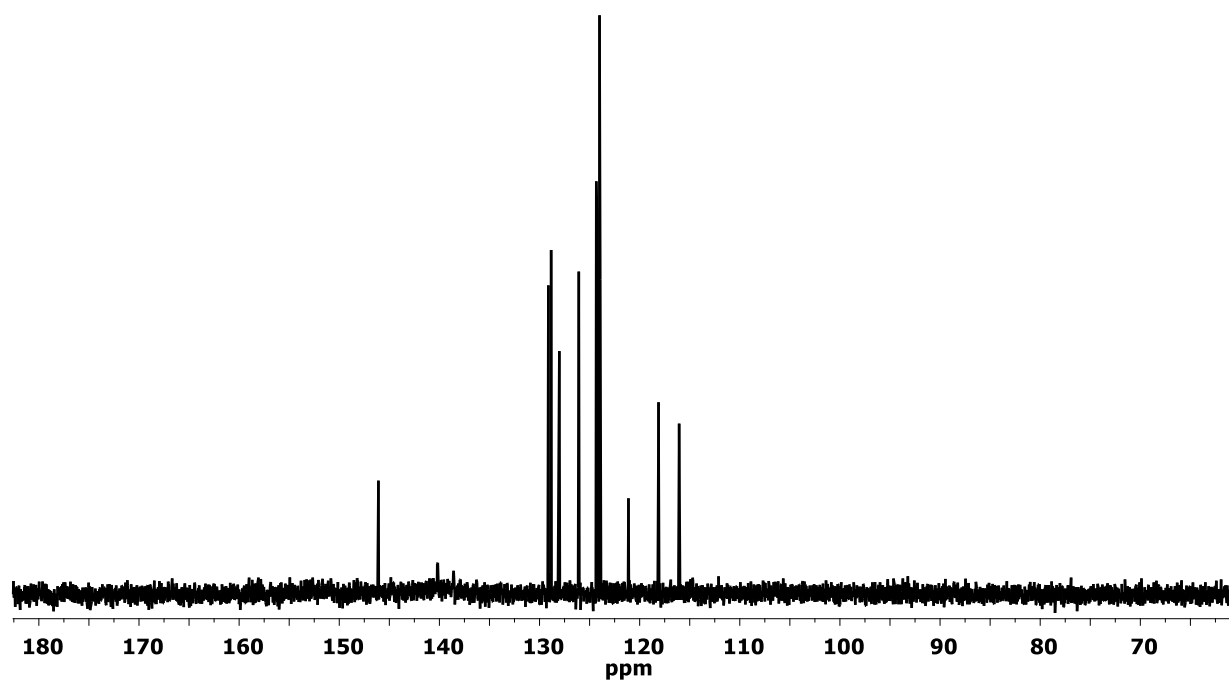

Figure S5.  $^{13}\text{C}$  NMR spectrum of the compound **PTZ1**,  $\text{DMSO-}d_6$ , 300 K, 100 MHz.

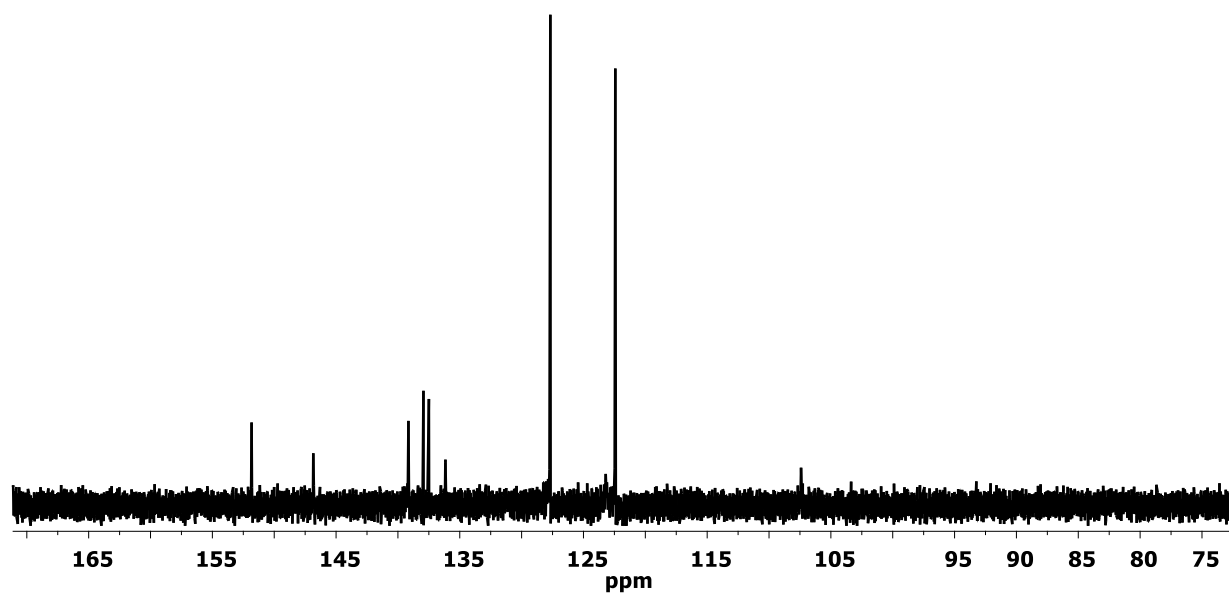

Figure S6.  $^{13}\text{C}$  NMR spectrum of the compound **PTZ2**,  $\text{DMSO-}d_6$ , 300 K, 100 MHz.

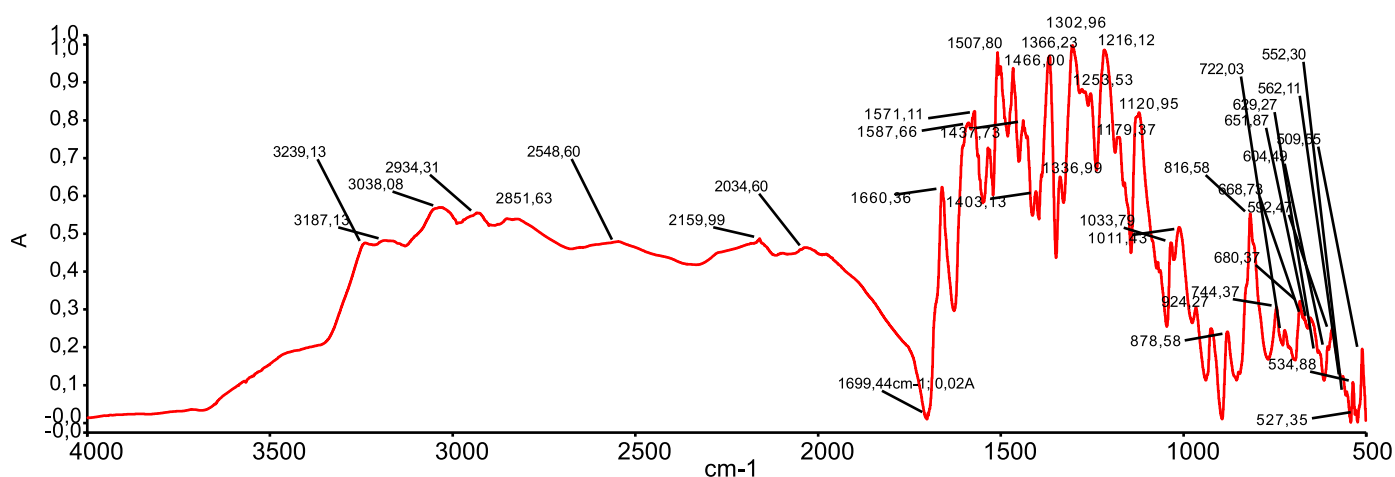

Figure S7. FT-IR spectrum of the compound **PTZa**.

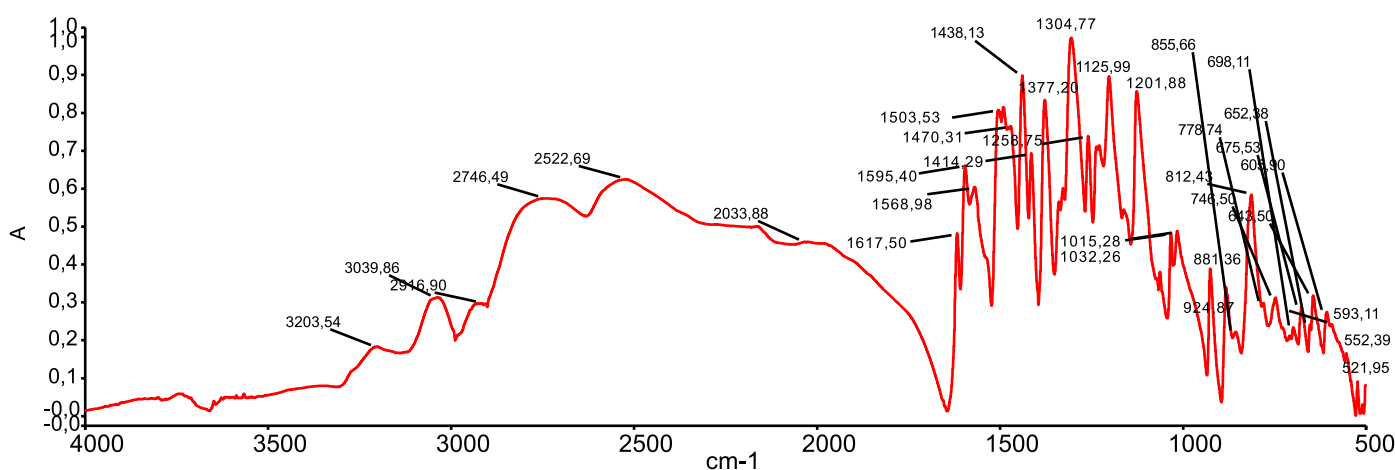

Figure S8. FT-IR spectrum of the compound **PTZ1**.

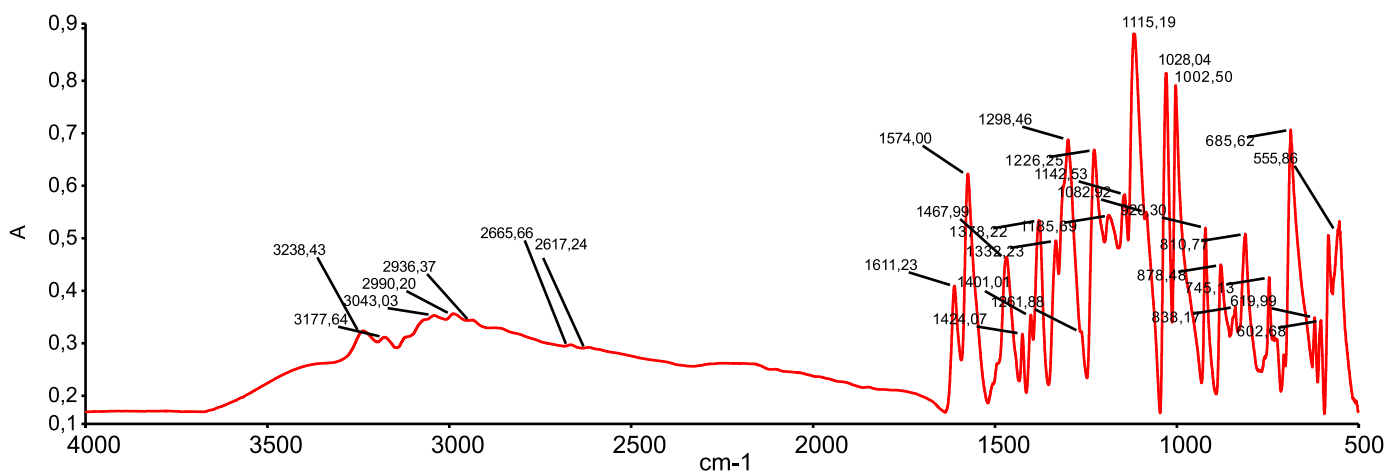

Figure S9. FT-IR spectrum of the compound **PTZ2**.

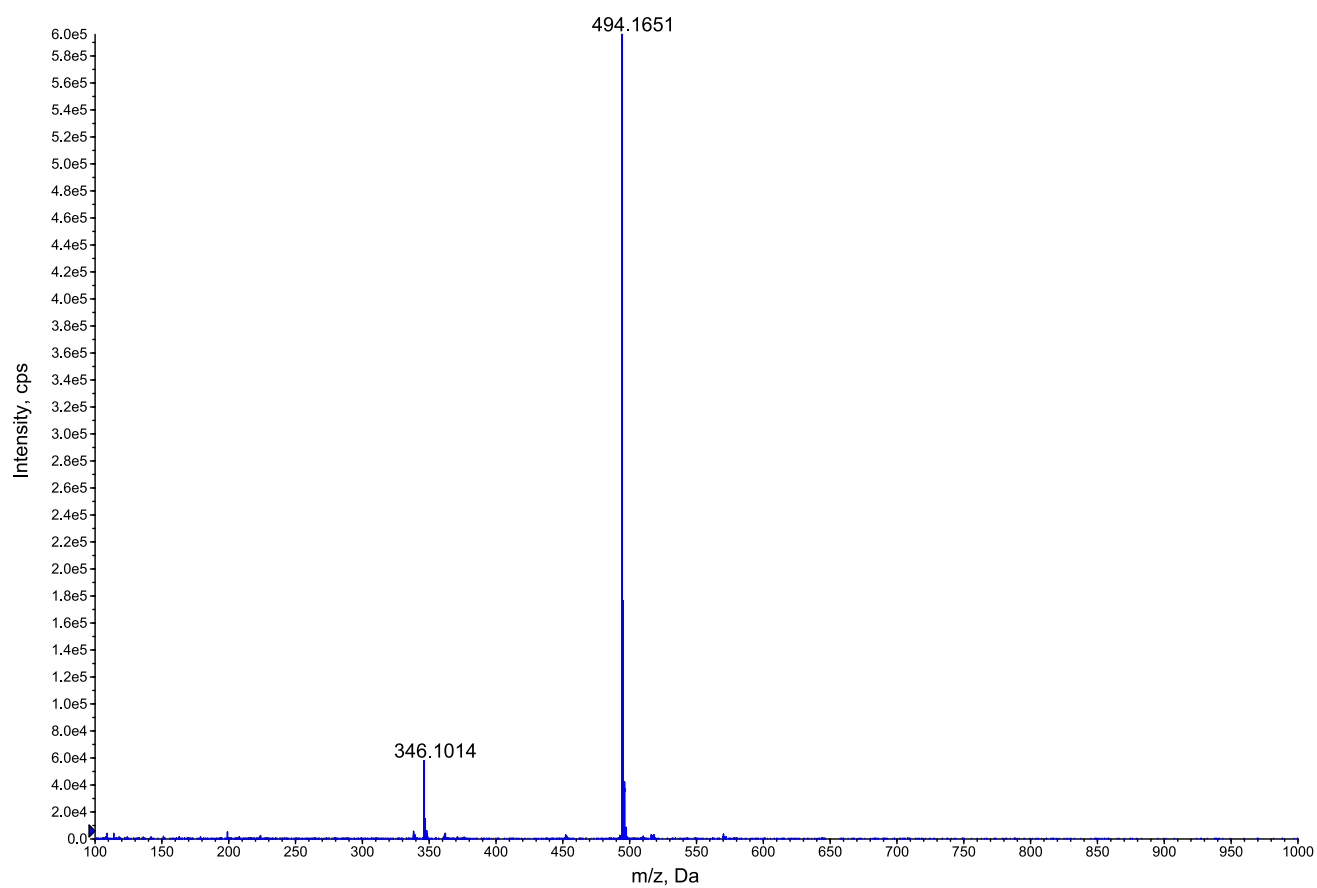

Figure S10. HRMS spectrum of the compound **PTZa**.

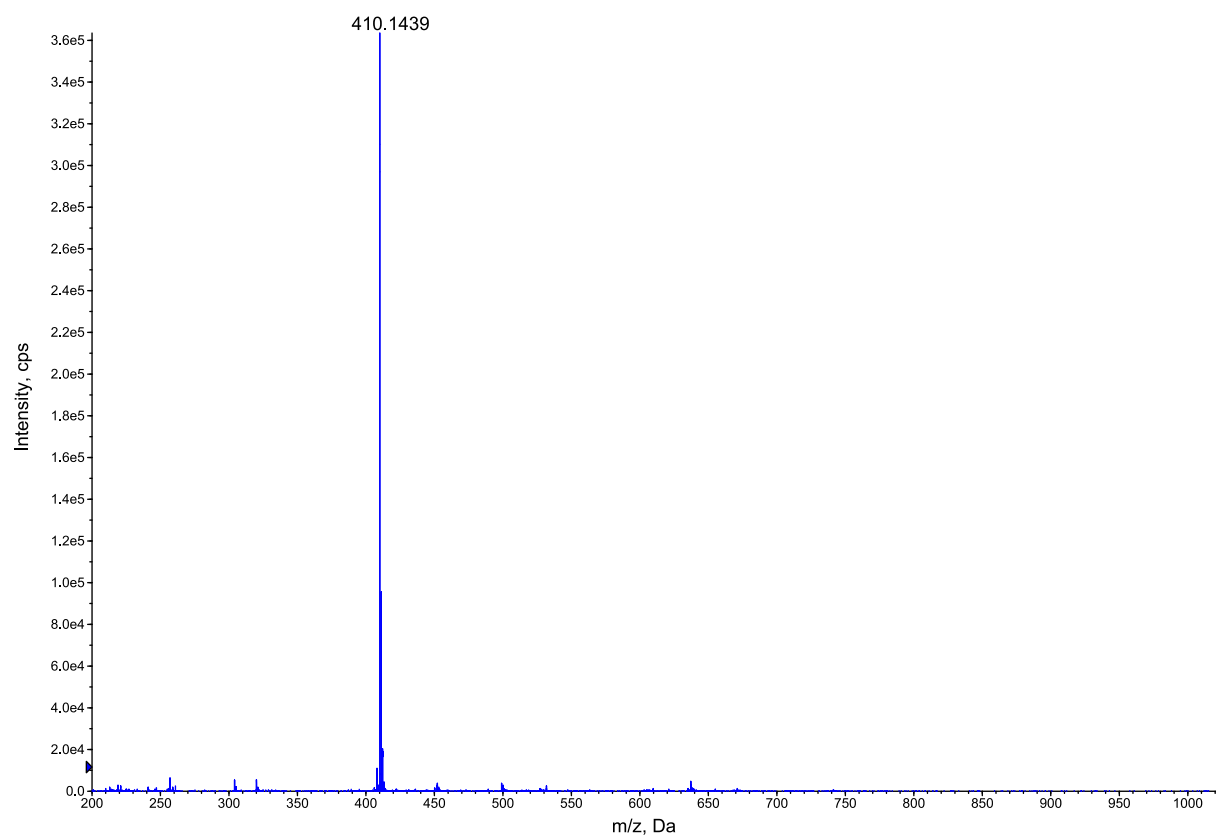

Figure S11. HRMS spectrum of the compound **PTZ1**.

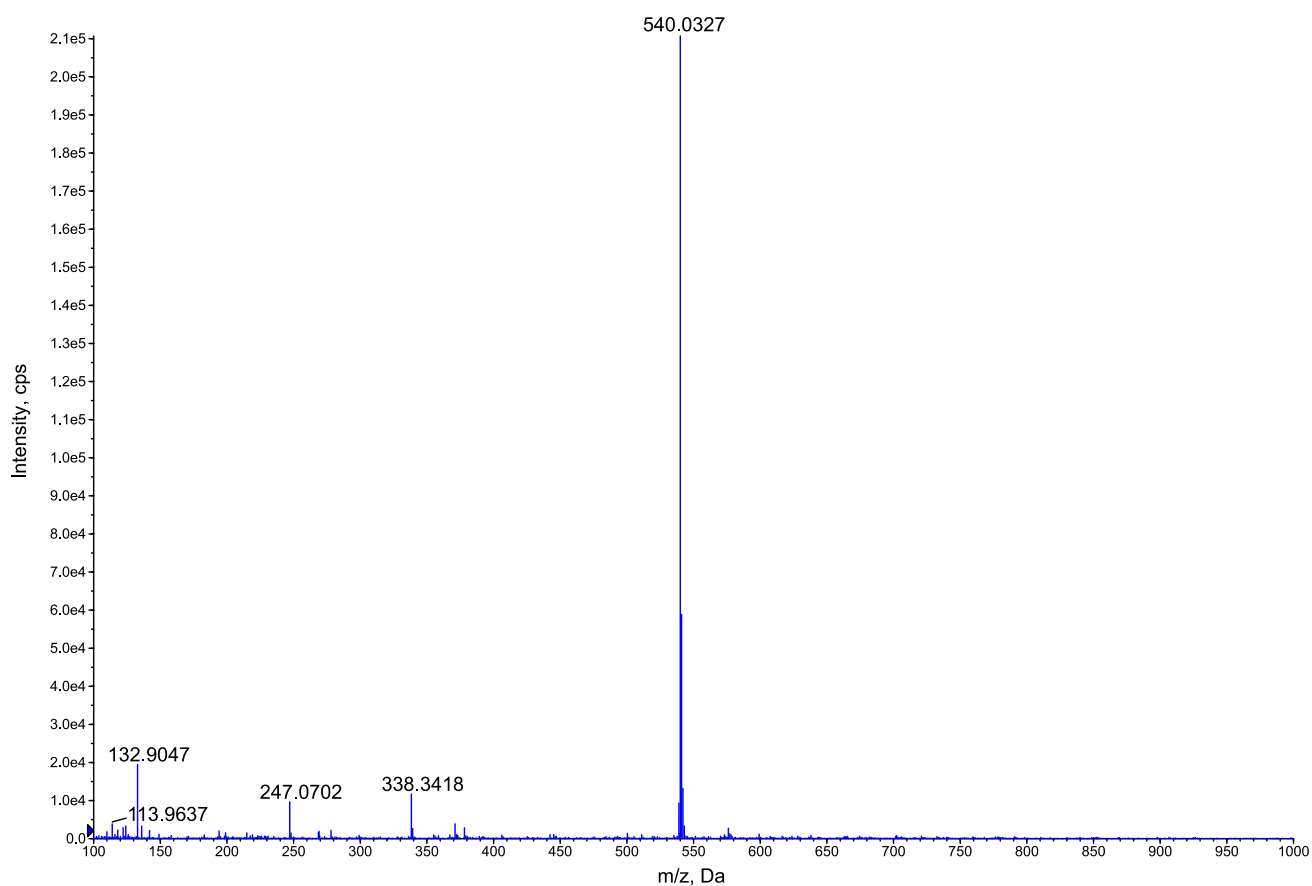

Figure S12. HRMS spectrum of the compound **PTZ2**.

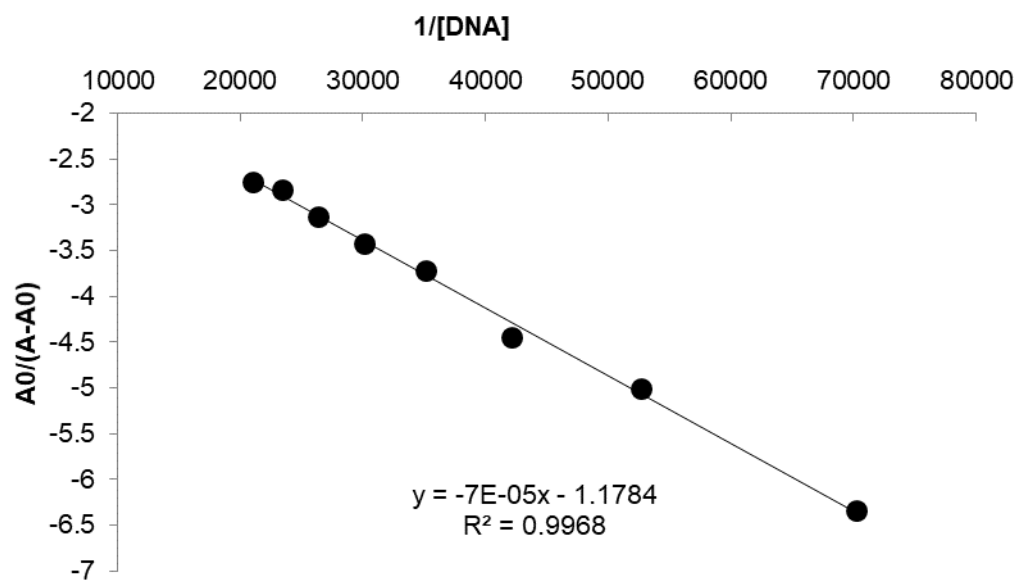

Figure S13.  $1/[\text{DNA}]$  versus  $A_0/(A - A_0)$  plot for **MB**-DNA UV-Vis titration.

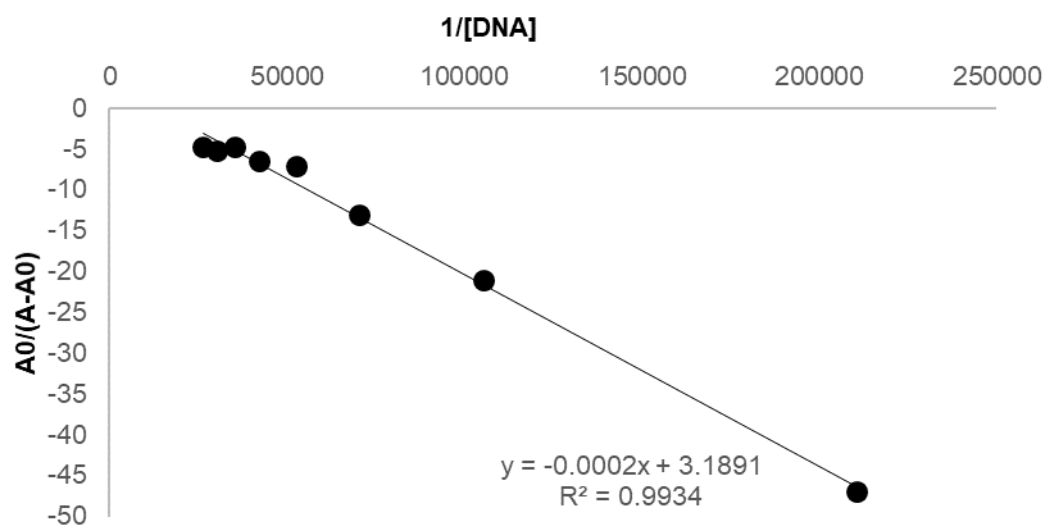

Figure S14.  $1/[\text{DNA}]$  versus  $A_0/(A-A_0)$  plot for **PTZ1**-DNA UV-Vis titration.
